# Supplementary material
Source: Springer Nature journal article supplement (https://www.springermedizin.de/resource/supplementary/40169_2012_37_MOESM1_ESM.pdf/9675460)

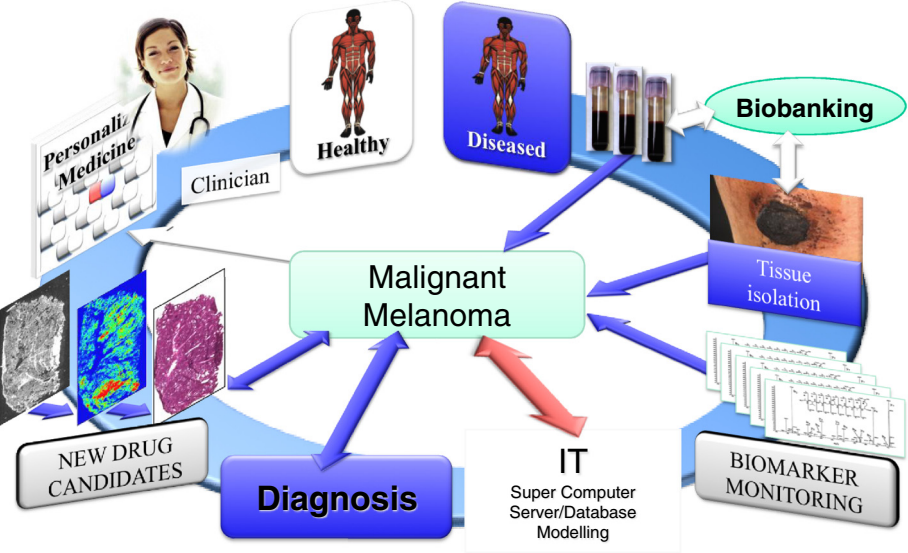

Supplement: MOESM1 [file 9675460]
